# Supplementary material
Source: HighWire-hosted journal article supplement (https://erj.ersjournals.com/content/54/6/1902104)
Supplement: inline-supplementary-material-1 [file inline-supplementary-material-1.pdf]

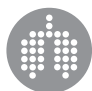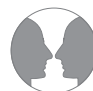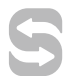

SHAREABLE PDF

# Testing bronchodilator responsiveness

Christer Janson <sup>1,2</sup>, Andrei Malinovschi<sup>3</sup>, Andre F.S. Amaral <sup>2</sup>, Simone Accordini<sup>4</sup>, Jean Bousquet<sup>5,6,7</sup>, A. Sonia Buist<sup>8</sup>, Judith Garcia-Aymerich <sup>9,10,11</sup>, Louisa Gnatiuc<sup>12</sup>, Wan Tan<sup>13</sup>, Kjell Torén<sup>14</sup>, Torsten Zuberbier<sup>7</sup> and Peter Burney<sup>2</sup> on behalf of all the authors

**Affiliations:** <sup>1</sup>Dept of Medical Sciences: Respiratory, Allergy and Sleep Research, Uppsala University, Uppsala, Sweden. <sup>2</sup>Population Health and Occupational Disease, National Heart and Lung Institute, Imperial College London, London, UK. <sup>3</sup>Dept of Medical Sciences: Clinical Physiology, Uppsala University, Uppsala, Sweden. <sup>4</sup>Unit of Epidemiology and Medical Statistics, Dept of Diagnostics and Public Health, University of Verona, Verona, Italy. <sup>5</sup>Fondation FMC VIA-LR, Montpellier, France. <sup>6</sup>Euforea, Brussels, Belgium. <sup>7</sup>Allergy Centre Charité, Dept of Dermatology and Allergy, Charité Universitätsmedizin Berlin, Berlin, Germany. <sup>8</sup>Pulmonary and Critical Care Medicine, Oregon Health and Science University, Portland, OR, USA. <sup>9</sup>ISGlobal, Barcelona, Spain. <sup>10</sup>Universitat Pompeu Fabra (UPF), Barcelona, Spain. <sup>11</sup>CIBER Epidemiología y Salud Pública (CIBERESP), Barcelona, Spain. <sup>12</sup>Clinical Trial Service Unit and Epidemiological Studies Unit, Nuffield Dept of Population Health, University of Oxford, Oxford, UK. <sup>13</sup>Centre for Heart Lung Innovation (Tan, Sin), University of British Columbia, St. Paul's Hospital Vancouver, Vancouver, BC, Canada. <sup>14</sup>Dept of Occupational and Environmental Medicine, University of Gothenburg, Gothenburg, Sweden.

**Correspondence:** Christer Janson, Uppsala University, Dept of Respiratory Medicine, Akademiska sjukhuset, Uppsala, SE 751 85, Sweden. E-mail: christer.janson@medsci.uu.se

@ERSpublications

**Neither flow-related nor volume-related bronchodilator reversibility were independently associated with the symptom burden, health status or dyspnoea in the COPD population** <http://bit.ly/2rigD1r>

**Cite this article as:** Janson C, Malinovschi A, Amaral AFS, *et al.* Testing bronchodilator responsiveness. *Eur Respir J* 2019; 54: 1902104 [<https://doi.org/10.1183/13993003.02104-2019>].

This single-page version can be shared freely online.

## From the authors:

We thank M.R. Miller for his comments on our paper regarding bronchodilator reversibility in asthma and COPD [1]. We agree that it is important to look at different ways of defining bronchodilator reversibility. In our analysis, we investigated both flow-related bronchodilator reversibility, defined by the change in forced expiratory volume in 1 s (FEV<sub>1</sub>), and volume-related bronchodilator reversibility, defined by the change in forced vital capacity. We also looked at both the change in lung function parameters expressed as percent of the baseline value and the change in FEV<sub>1</sub> standardised by the subject's predicted value. The latter was evaluated to control for the sex, age and height dependency of lung function. The results when reversibility was expressed as percent of the predicted value (in supplementary tables E3 and E4) [1] were the same as when reversibility was expressed as percent of the baseline value. Our interpretation was therefore that, in the present study, neither flow-related nor volume-related bronchodilator reversibility were independently associated with the symptom burden, health status or dyspnoea in the COPD population.
